# Supplementary material
Source: publisher figshare collection journal article supplement (https://gsajournals.figshare.com/ndownloader/files/28547709)
Supplement: Supplementary file 1 [file 28547709]

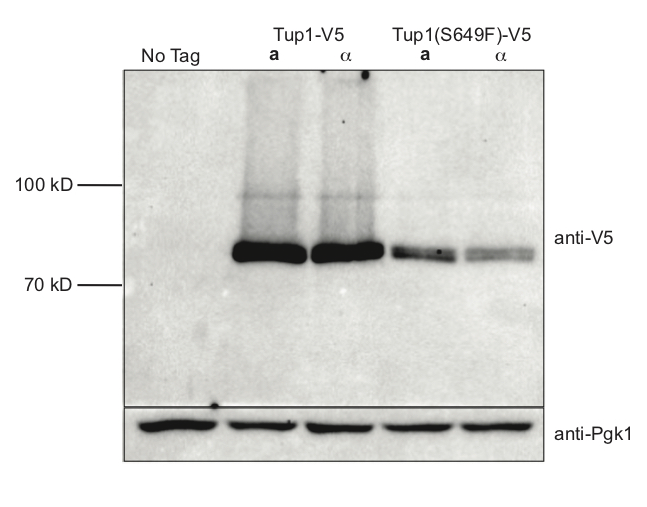


Figure S1. Comparison of Tup1 vs. Tup1(S649F) protein levels in a vs.  strains.

Relative protein levels for Tup1-V5 and Tup1(S649F)-V5 strains were determined by western immunoblot analysis. Total yeast lysate from equal numbers of cells, as judged by optical density, were loaded for each lane. Anti-V5 antibody (Abcam, SV5-Pk1) was used for the top portion of the blot, and anti-Pgk1 (Invitrogen) was used for the bottom portion of the blot as a loading control.
